# Supplementary material
Source: PubMed Central journal article supplement (PMC6146979)
Supplement: zam019188776s1.pdf [file zam019188776s1.pdf]

**Table S1 PKS and NRPS conserved domain structure amongst secondary metabolites gene cluster in *A. ochraceus* fc-1**

| Scaffold        | Cluster        | Category           | Module     | Gene                | Domain*                       |                       |
|-----------------|----------------|--------------------|------------|---------------------|-------------------------------|-----------------------|
| Scaffold_Scf_10 | Cluster 1      | NRPS               | NRPS       | AoFC_11180          | A-P-C-A-P-C                   |                       |
|                 |                |                    |            | AoFC_11183          | A-P-C-A-NAD                   |                       |
|                 | Cluster 2      | NRPS               | NRPS       | AoFC_11426          | A-P-E-C-A-P-C                 |                       |
| Scaffold_Scf_1  | Cluster 3      | NRPS               | NRPS       | AoFC_11716          | A-P-E-C-A-A-P-C-A-P-E-C-P-C-P |                       |
|                 | Cluster 5      | NRPS-T1pks         | PKS-NRPS   | AoFC_00015          | ER                            |                       |
|                 |                |                    |            | AoFC_00016          | KS-AT-DH-cMT-KR-C-A-P-TD      |                       |
|                 | Cluster 7      | T1pks-Terpene      | PKS        | AoFC_00120          | KS-AT-DH-cMT-ER-KR            |                       |
|                 | Cluster 8      | T1pks              | PKS        | AoFC_00237          | KS-AT-ACP-TE                  |                       |
|                 | Cluster 10     | T1pks              | PKS        | AoFC_00328          | KS-AT                         |                       |
|                 | Cluster 11     | Terpene-Nrps-T1pks | PKS-NRPS   | AoFC_00343          | KS-AT-DH-KR-ACP-C-A-P-TD      |                       |
|                 | Cluster 12     | T1pks              | PKS        | AoFC_01462          | KS-AT                         |                       |
|                 |                |                    |            | AoFC_01463          | cMT                           |                       |
|                 | Cluster 15     | T1pks              | PKS        | AoFC_01791          | KS-AT-DH-cMT-ER-KR-NAD        |                       |
|                 |                |                    |            | AoFC_01795          | KS-AT-DH-cMT-ER-KR            |                       |
|                 | Cluster 16     | T1pks              | PKS        | AoFC_01818          | A-P-KS-AT-KR-ACP-TD           |                       |
|                 | Cluster 17     | T1pks              | PKS        | AoFC_01940          | KS-AT-DH--KR-ACP              |                       |
|                 | Scaffold_Scf_2 | Cluster 20         | T1pks      | PKS                 | AoFC_02280                    | KS-AT-ACP-ACP-TE      |
|                 |                | Cluster 21         | T1pks      | PKS                 | AoFC_02377                    | KS-AT-DH-cMT-ER-KR    |
|                 |                | Cluster 22         | T1pks      | PKS                 | AoFC_02401                    | KS-AT-DH-cMT-KR       |
|                 |                | Cluster 24         | T1pks      | PKS                 | AoFC_02436                    | KS-AT-DH-cMT-ER-KR-TD |
| Cluster 25      |                | T1pks-Nrps         | PKS NRPS   | AoFC_02449          | KS-AT-DH-cMT-ER-KR-ACP        |                       |
|                 |                |                    |            | AoFC_02451          | A-P-C-A-P-C                   |                       |
| Cluster 30      |                | Nrps-T1pks         | PKS NRPS   | AoFC_02999          | KS-AT-DH-cMT-KR-ACP-C-A       |                       |
|                 |                |                    |            | AoFC_03000          | A                             |                       |
|                 |                |                    |            | AoFC_03008          | A-P-TD                        |                       |
| Cluster 31      |                | NRPS               | NRPS       | AoFC_03076          | A-P-C-A-P-C-A-P-C-A-P-C       |                       |
| Cluster 33      |                | Nrps-T1pks         | PKS-NRPS   | AoFC_03540          | oMT                           |                       |
|                 | AoFC_03541     |                    |            | TE                  |                               |                       |
|                 | AoFC_03542     |                    |            | KS-AT-DH-KR-C-A-P   |                               |                       |
|                 | AoFC_03569     |                    |            | KS-AT-DH-ACP-ACP-TE |                               |                       |
| Cluster 34      | T1pks          | PKS                | AoFC_03569 | KS-AT-DH-ACP-ACP-TE |                               |                       |
| Scaffold_Scf_3  | Cluster 38     | T1pks              | PKS        | AoFC_04242          | KS-AT-DH-ER-KR                |                       |
|                 | Cluster 41     | NRPS               | NRPS       | AoFC_04810          | A-P-C-A-P-E-C                 |                       |
|                 | Cluster 42     | NRPS               | NRPS       | AoFC_04923          | A-P-C-A-P-E-C                 |                       |
| Scaffold_Scf_4  | Cluster 43     | T1pks              | PKS        | AoFC_05134          | KS-AT-ACP-ACP-TE              |                       |
|                 | Cluster 44     | Nrps-Terpene       | NRPS       | AoFC_05313          | A-C-A-P-C-P                   |                       |
|                 | Cluster 45     | Nrps-T1pks         | NRPS       | AoFC_05376          | C-A                           |                       |
|                 |                |                    |            | AoFC_05377          | KS-AT-DH-cMT-ER-KR-ACP        |                       |
|                 | Cluster 46     | T1pks              | PKS        | AoFC_05416          | KS-AT-DH-cMT-ER-KR-ACP        |                       |
|                 | Cluster 48     | NRPS               | NRPS       | AoFC_05882          | A                             |                       |
|                 |                |                    |            | AoFC_05883          | A-C-A-C-A-C-ACP-C-C           |                       |
|                 | Cluster 50     | T1pks              | PKS        | AoFC_06064          | KS-AT-DH-cMT-ER-KR            |                       |
|                 | Cluster 52     | NRPS               | NRPS       | AoFC_06119          | A-P-C-A-P-C                   |                       |
|                 |                |                    |            | AoFC_06120          | A-P-C                         |                       |
| Scaffold_Scf_5  | Cluster 55     | T1pks              | PKS        | AoFC_06330          | KS-AT-DH-ER-KR-ACP            |                       |
|                 | Cluster 57     | T1pks              | PKS        | AoFC_06374          | KS-AT-DH-ER-KR-ACP            |                       |
|                 | Cluster 58     | Terpene-Nrps       | NRPS       | AoFC_06430          | C-A-nMT-P-C-A-P-TE            |                       |
|                 | Cluster 59     | NRPS               | NRPS       | AoFC_06550          | A-P-C-C-A-P-E-C               |                       |
|                 | Cluster 60     | T1pks              | PKS        | AoFC_06810          | KS-AT-DH-cMT-ER-KR-ACP        |                       |
|                 | Cluster 62     | NRPS               | NRPS       | AoFC_07015          | C-A-P-E-C-A-P-C-A-P-C         |                       |
|                 |                |                    |            | AoFC_07020          | A-ACP-TE                      |                       |

|                |                |               |          |            |                             |
|----------------|----------------|---------------|----------|------------|-----------------------------|
| Scaffold_Scf_6 | Cluster 63     | T1pks         | PKS      | AoFC_07038 | KS-AT-DH-cMT-ER-KR-ACP      |
|                | Cluster 65     | T1pks         | PKS      | AoFC_07251 | KS-AT-DH-cMT-ER-KR          |
|                | Cluster 67     | T1pks         | PKS      | AoFC_07482 | KR                          |
|                |                |               |          | AoFC_07483 | KS-AT-DH-ER-KR              |
|                | Cluster 68     | T1pks         | PKS      | AoFC_07533 | KS-AT-DH-cMT-ER-KR          |
|                | Cluster 69     | T1pks         | PKS      | AoFC_07597 | KS-AT-DH-cMT-ER-KR          |
| Scaffold_Scf_7 | Cluster 70     | NRPS          | NRPS     | AoFC_07623 | A                           |
|                |                |               |          | AoFC_07624 | P-C-A-P                     |
|                | Cluster 72     | T1pks-Terpene | PKS      | AoFC_07667 | KS-AT-ACP-cMT-TD            |
|                | Cluster 75     | NRPS          | NRPS     | AoFC_08050 | A-P-C-A-P-C-A-P-E-C-A-P-C   |
|                | Cluster 76     | T1pks         | PKS      | AoFC_08067 | KS-AT-DH-cMT-ER-KR-ACP      |
|                | Scaffold_Scf_8 | Cluster 80    | NRPS     | NRPS       | AoFC_08653                  |
| Cluster 81     |                | T1pks         | PKS      | AoFC_08701 | KR-KS-AT-DH-ACP-TE          |
|                |                |               |          | AoFC_08706 | A-P-TD                      |
| Cluster 82     |                | T1pks         | PKS      | AoFC_08990 | KS-AT-DH-cMT-ER-KR          |
| Cluster 84     |                | NRPS          | NRPS     | AoFC_09529 | A-P-C-P-C                   |
| Cluster 85     |                | NRPS          | NRPS     | AoFC_09543 | A-P-C-A-P-C-A-P-C-A-P-C     |
| Scaffold_Scf_9 | Cluster 86     | Nrps-T1pks    | PKS-NRPS | AoFC_09572 | KS-AT-DH-ER-KR-ACP-C-A-P-TD |
|                |                |               |          | AoFC_09573 | KR                          |
|                | Cluster 88     | T1pks-Nrps    | PKS NRPS | AoFC_09698 | KS-AT-DH-cMT-ER-KR-ACP      |
|                |                |               |          | AoFC_09699 | A-P-C-A                     |
|                | Cluster 89     | T1pks         | PKS      | AoFC_09789 | KS-AT-DH-cMT-ER-KR-ACP      |
|                | Cluster 90     | NRPS          | NRPS     | AoFC_09894 | A-P-C-A-TD                  |
| Scaffold_Scf_9 | Cluster 91     | T1pks         | PKS      | AoFC_10219 | KS-AT-DH-cMT-ER-KR-ACP      |
|                | Cluster 92     | Terpene-Nrps  | NRPS     | AoFC_10399 | A-P-C-A-P-C                 |
|                | Cluster 96     | T1pks         | PKS      | AoFC_10736 | KS-AT-DH-ER-KR              |
|                | Cluster 97     | T1pks         | PKS      | AoFC_10776 | A                           |
|                |                |               |          | AoFC_10777 | KS-AT-DH-cMT-ER-KR-ACP      |

\*PKS and NRPS proteins were chosen from the secondary metabolic gene clusters after these clusters were predicted by antiSMASH 3.0 and the conserved domains were respectively listed in table. Domain abbreviations:  $\beta$ -ketosynthase (KS); acyl-transferase (AT); dehydratase (DH); C-methyltransferase (cMT); enoylreductase (ER);  $\beta$ -ketoreductase (KR); acyl-carrier protein domain(ACP); adenylation domain (A); condensation domain(C); peptidyl-carrier protein domain (P); NAD: NAD-

**Table S2 Genomic properties of OTA-producing fungi, compared to *A. ochraceus***

|                                | <i>A. ochraceus</i> fc-1 | <i>A. carbonarius</i> ITEM 5010 | <i>A. niger</i> CBS 513.88 | <i>A. steynii</i> IBT 23096 | <i>A. westerdijkiae</i> CBS 112803 | <i>P. nordicum</i> BFE487 |
|--------------------------------|--------------------------|---------------------------------|----------------------------|-----------------------------|------------------------------------|---------------------------|
| <b>Scaffolds</b>               |                          |                                 |                            |                             |                                    |                           |
| Total Length (Kb)              | 37020                    | 36290                           | 33931                      | 37848                       | 36072                              | 30421.3                   |
| GC content (%)                 | 48.79                    | 51.72                           | 50.40                      | 49.07                       | 50.38                              | 47.69                     |
| N50(Kb)                        | 3843                     | 1827                            |                            | 3921                        | 1603                               | 122                       |
| Number of Protein Coding Genes | 11740                    | 11624                           | 14165                      | 11437                       | 11744                              | 11075                     |
| Mean Gene Length (bp)          | 1680                     | 1547.93                         | 1573                       | 1797                        | 1687                               | 2190                      |
| Percent Coding (%)             | 53.29                    | 49.58                           | 55.20                      | 54.33                       | 54.93                              | 79.73                     |
| Genes with Introns (%)         | 78.50                    | 77.64                           | 87.00                      | 77.97                       | 80.30                              | 82.95                     |
| <b>Exons</b>                   |                          |                                 |                            |                             |                                    |                           |
| Average size (bp)              | 475.83                   | 442.40                          | 370                        | 479.31                      | 460.76                             | 418.17                    |
| Number                         | 37371                    | 36274                           | 50629                      | 38233                       | 37874                              | 38600                     |
| Mean # per Gene                | 3.18                     | 3.12                            | 3.5                        | 3.34                        | 3.22                               | 3.48                      |
| GC Content (%)                 | 54.87                    | 55.04                           | 53.7                       | 55.79                       | 54.99                              | 52.59                     |
| Total Length (bp)              | 17782101                 | 16047660                        | 18733984                   | 18325644                    | 17451059                           | 16141362                  |
| <b>Introns</b>                 |                          |                                 |                            |                             |                                    |                           |
| Average size (bp)              | 75.92                    | 78.90                           | 97.2                       | 83.49                       | 90.44                              | 102.29                    |
| Number                         | 25631                    | 24649                           | 36464                      | 26796                       | 26130                              | 27525                     |
| Mean # per Gene                | 2.18                     | 2.12                            | 2.60                       | 2.34                        | 2.22                               | 2.48                      |
| GC Content (%)                 | 46.07                    | 48.57                           | 45.3                       | 47.22                       | 46.19                              | 42.03                     |
| Total Length (bp)              | 1945895                  | 1944796                         | 3544638                    | 2237164                     | 2363125                            | 2815750                   |
| <b>RNA</b>                     |                          |                                 |                            |                             |                                    |                           |
| tRNA number                    | 238                      | 264                             | 269                        | 222                         | 210                                | 183                       |
| rRNA number                    | 47                       | 4                               | 59                         | 120                         | 4                                  | 30                        |

**Fig. S1**

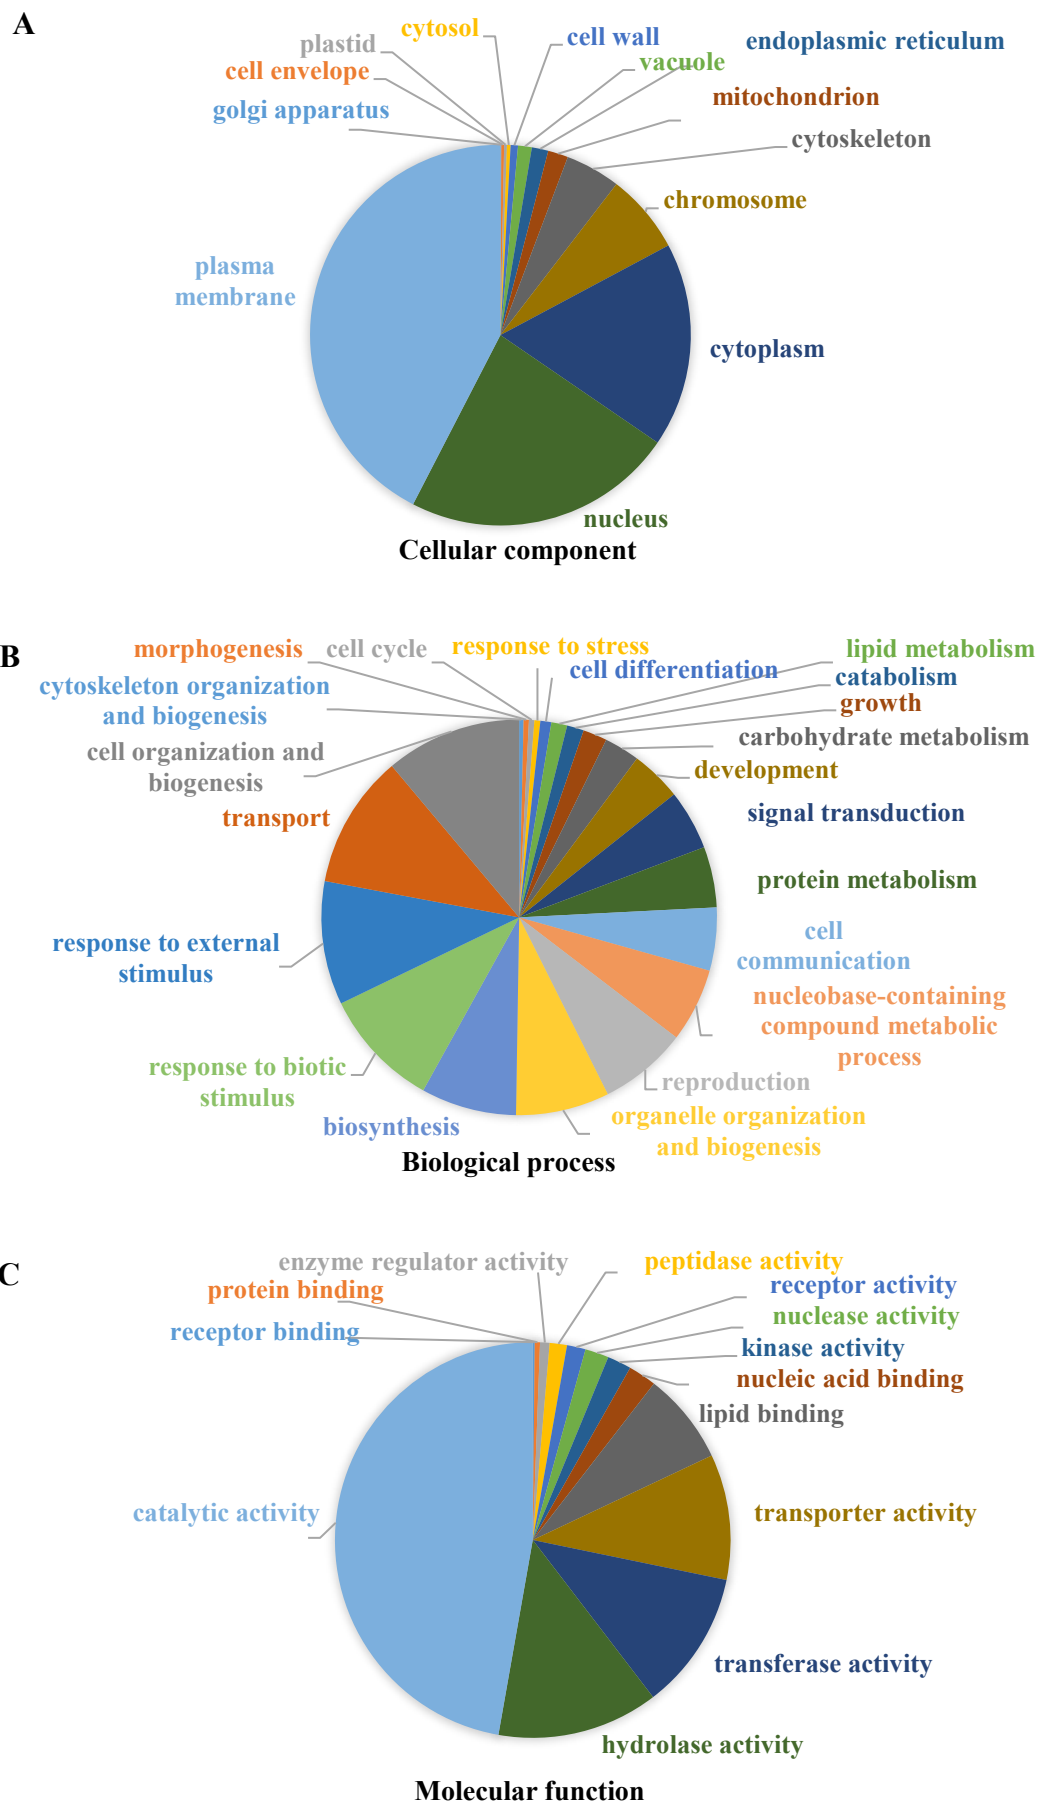

**FIG. S1** Gene Ontology (GO) analyse of *A. ochraceus* genome. The functional distribution of the genomic annotation is presented for three principal categories: (A) cellular component, (B) biological process, and (C) molecular function.
